# Supplementary material
Source: ML conference proceedings conference paper supplement (https://openaccess.thecvf.com/content/ICCV2023/html/Zhu_Cross-Modal_Orthogonal_High-Rank_ICCV_2023_paper.html)

Success plot

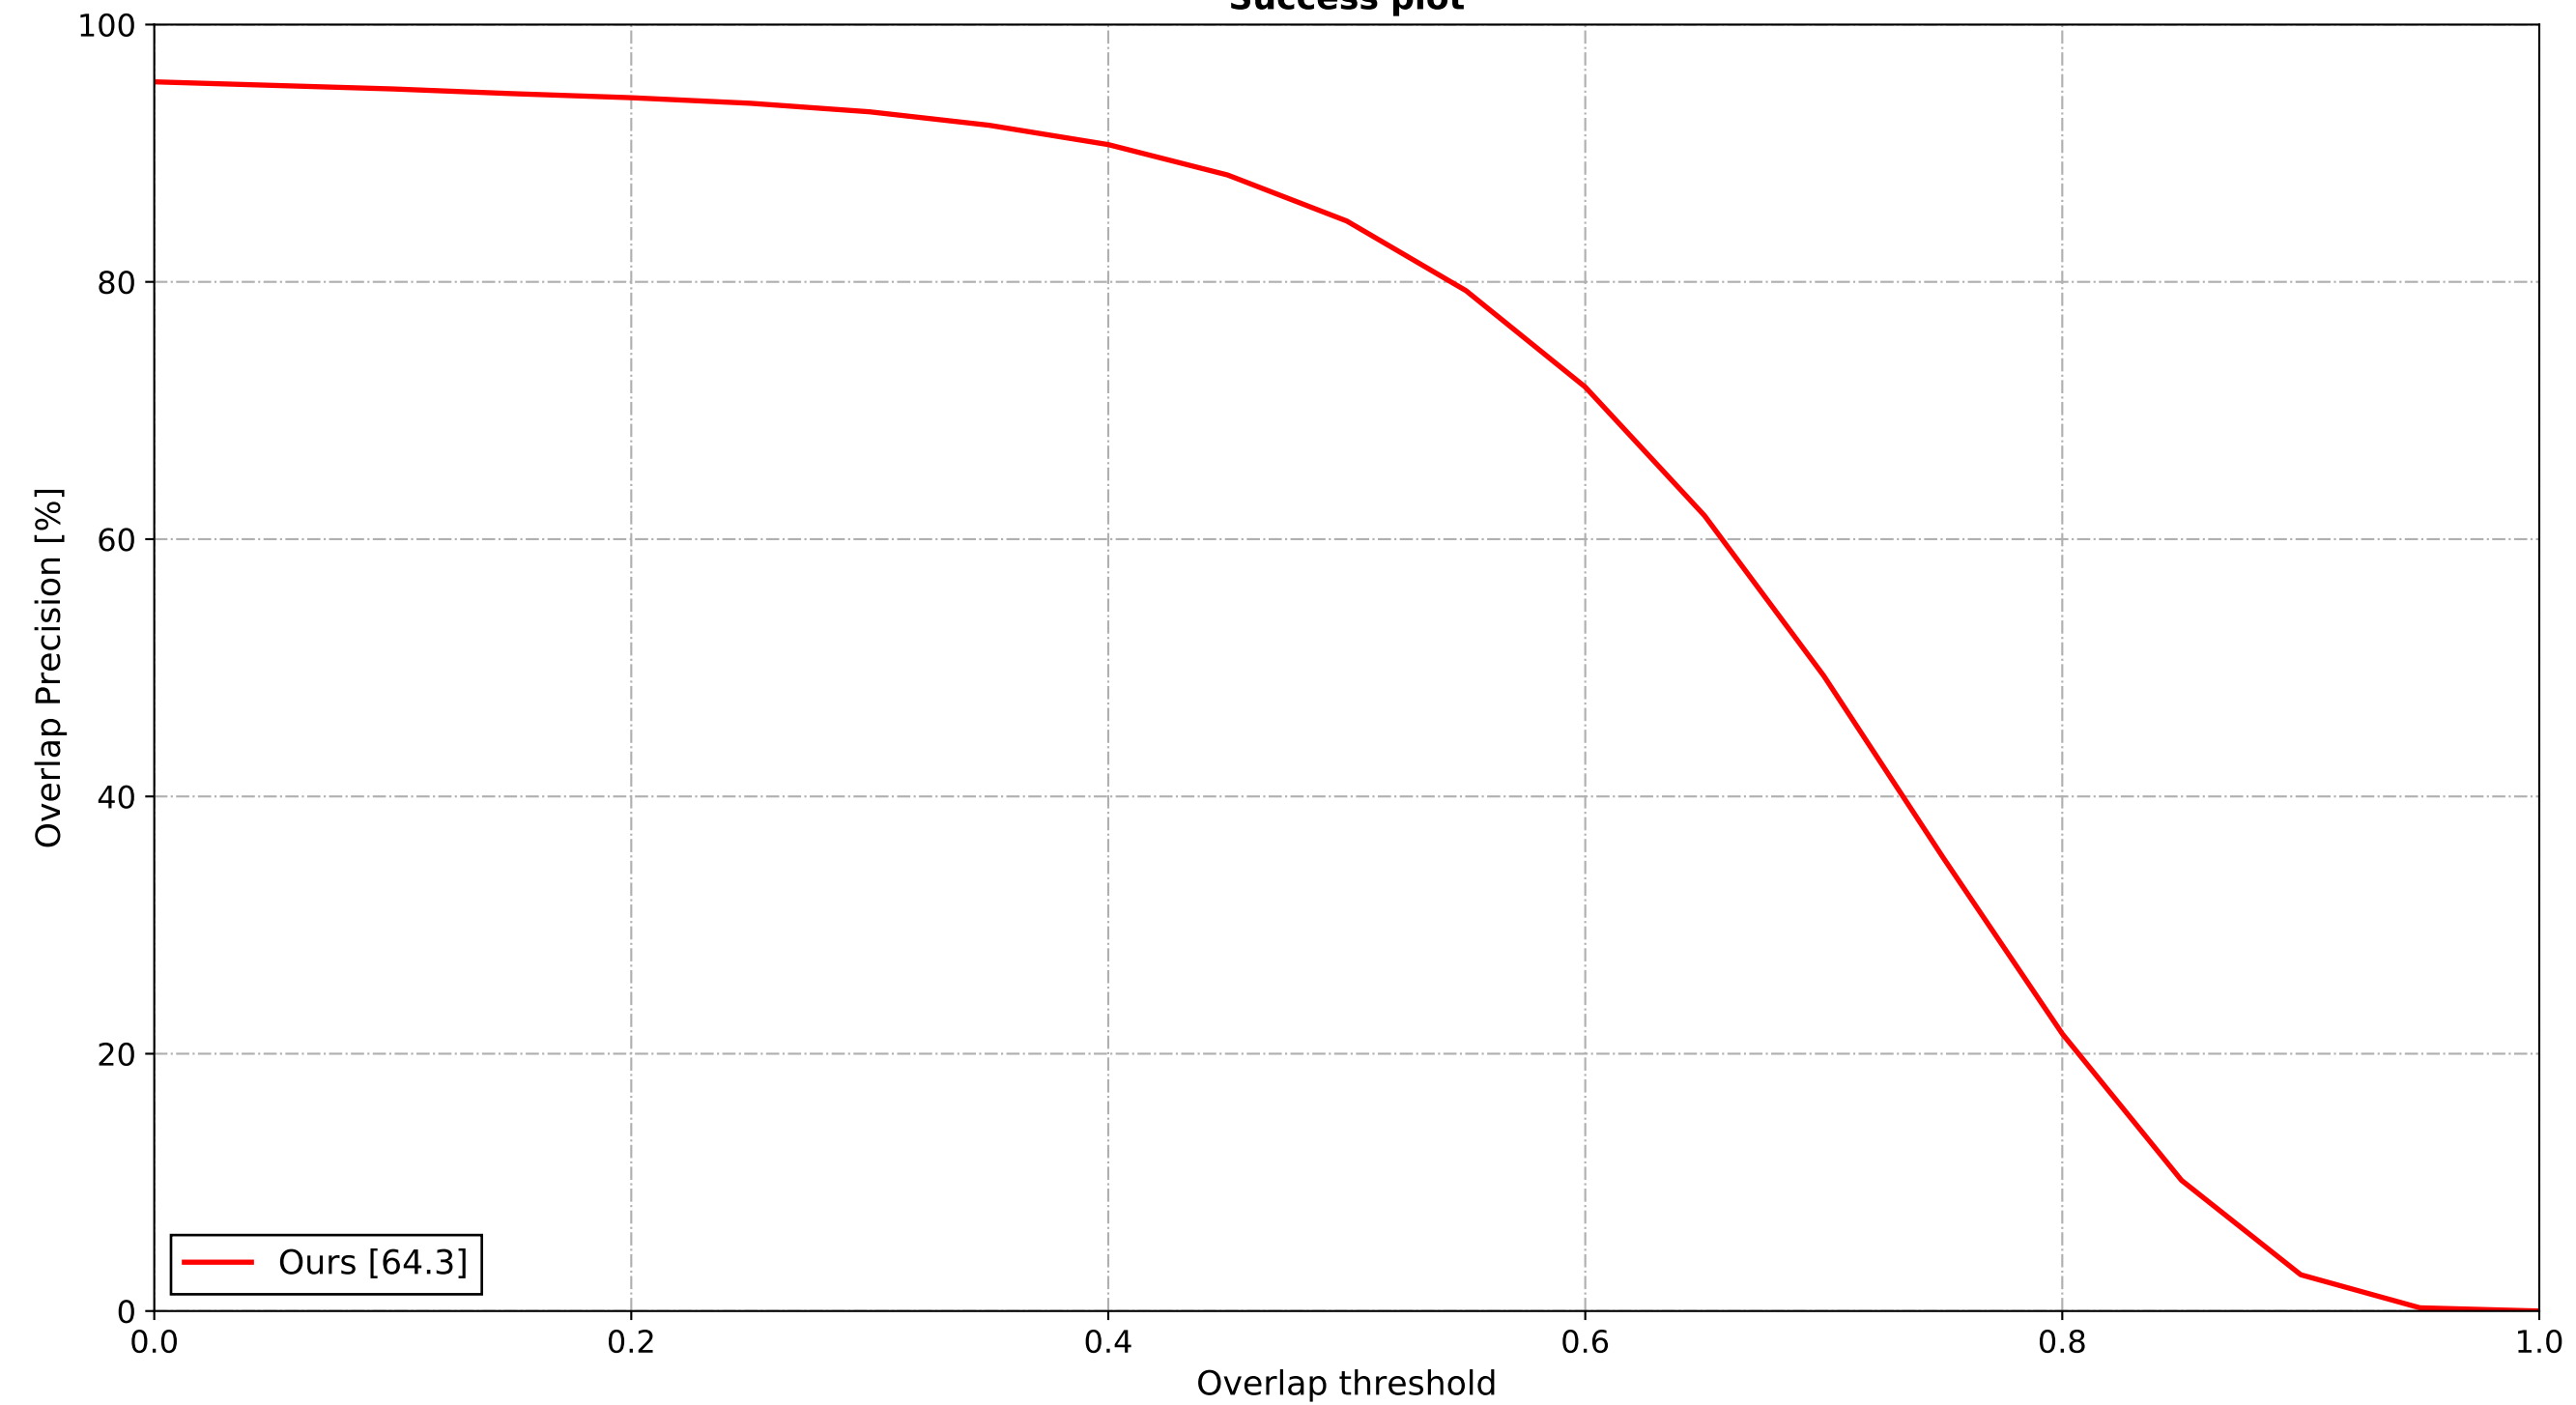

Supplement: Supplementary file 1 [file Zhu_Cross-Modal_Orthogonal_High-Rank_ICCV_2023_supplemental.zip]

**Precision plot**

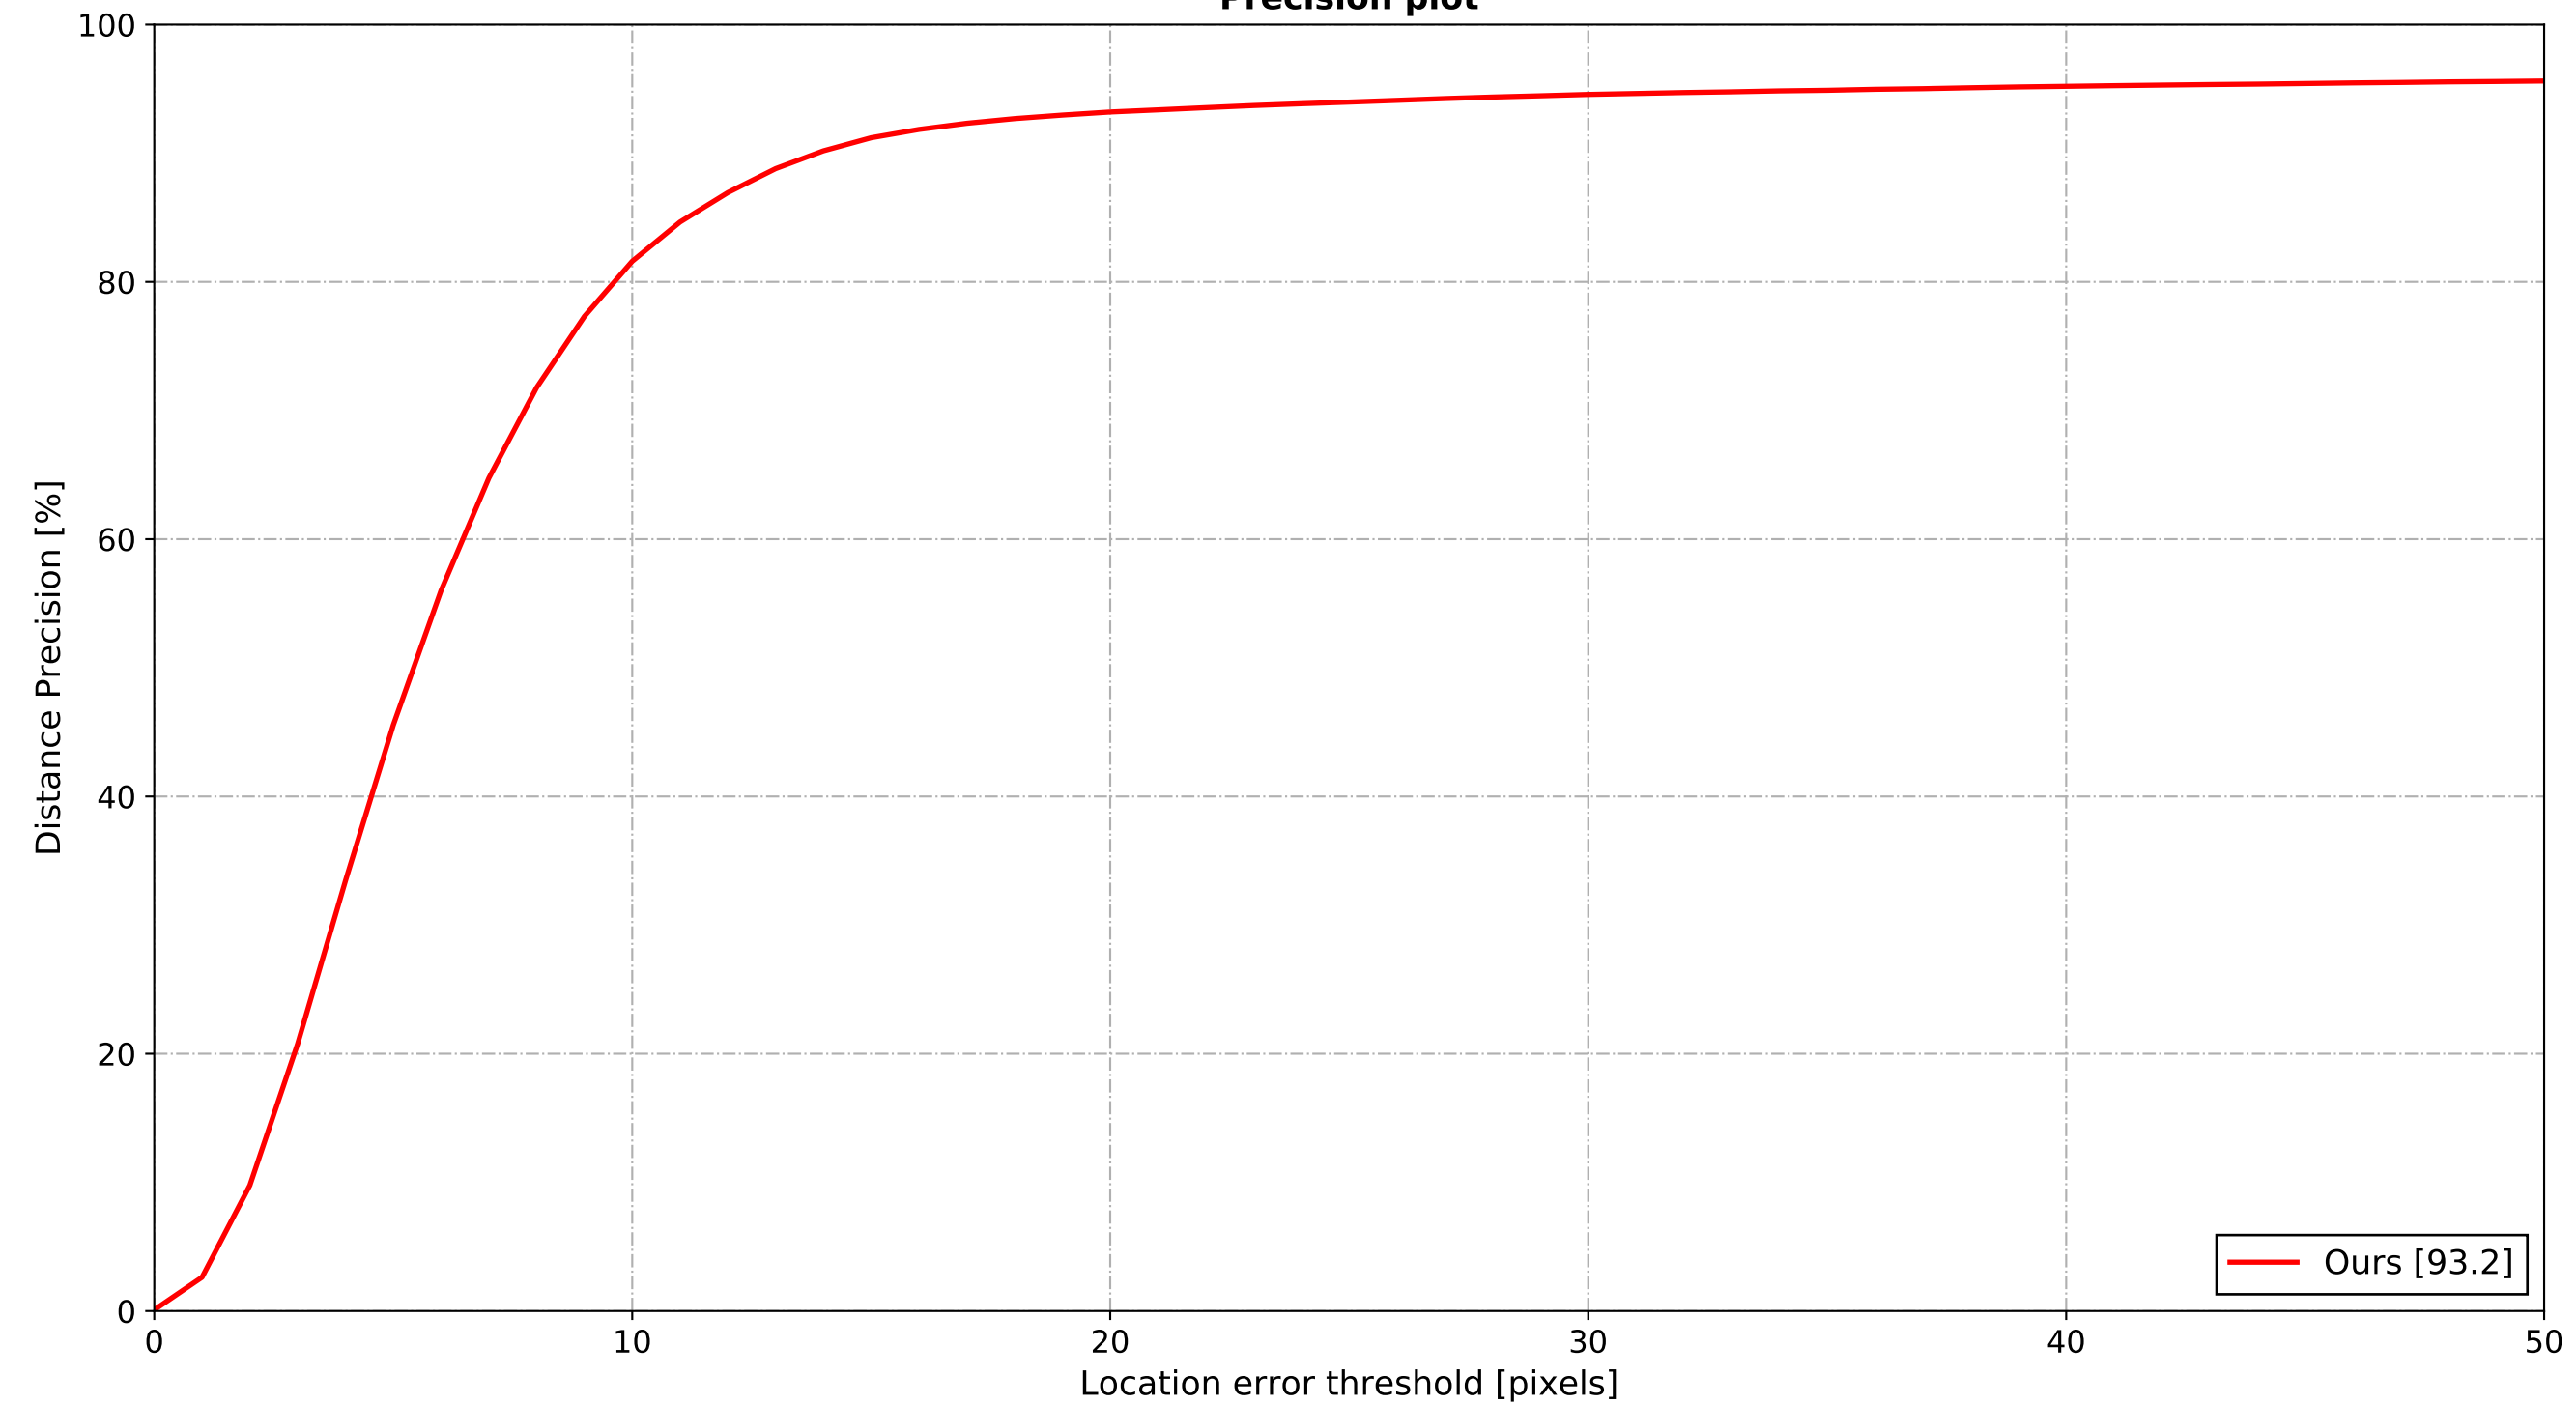

Supplement: Supplementary file 2 [file Zhu_Cross-Modal_Orthogonal_High-Rank_ICCV_2023_supplemental.zip]
